# Supplementary material
Source: PubMed Central journal article supplement (PMC7136852)
Supplement: jamainternmed-180-707-s001.pdf [file jamainternmed-180-707-s001.pdf]

## Supplementary Online Content

Baghdadi JD, Brook RH, Uslan DZ, et al. Association of a care bundle for early sepsis management with mortality among patients with hospital-onset or community-onset sepsis. *JAMA Intern Med*. Published online April 6, 2020.  
doi:10.1001/jamainternmed.2020.0183

**eTable 1.** Pairwise Correlation Between Individual SEP-1 Sepsis Bundle Components for Patients with Community-onset Sepsis and Hospital-onset Sepsis

**eTable 2.** Relative Risk of In-hospital Mortality Associated with Clinical Variables in the Raw Cohorts with Community-onset and Hospital-onset Sepsis

**eTable 3.** Characteristics of the Total Sample Before and After Being Rebalanced on Propensity for Treatment and Observable Characteristics

**eTable 4.** Relative Risk of In-hospital Mortality Associated with Clinical Variables in the Raw Total Sample

**eTable 5.** Results from Endogenous Treatment Effects Models Compared with Unweighted/Unbalanced Regression

**eTable 6.** Prespecified Sensitivity Analyses Evaluating Treatment Effect of the Complete SEP-1 Bundle in Different Cohorts

**eTable 7.** Treatment Effects of SEP-1 Bundle Components in Different Cohorts

**eTable 8.** Treatment Effects of SEP-1 Sepsis Bundle and Components on 30-Day In-hospital Mortality in Total Sample and Rebalanced Cohorts with Community-onset and Hospital-onset Sepsis

**eTable 9.** Treatment Effects of SEP-1 Sepsis Bundle and Components on Hospital Length of Stay (Measured from Time Zero of Sepsis until Discharge)

**eTable 10.** Treatment Effects of SEP-1 Sepsis Bundle and Components on Composite Outcome of In-hospital Mortality or Discharge to Hospice

**eTable 11.** Treatment Effects of SEP-1 Sepsis Bundle and Components in Rebalanced Cohorts with Sepsis Presenting on the Inpatient Ward or Intensive Care Unit

**eTable 12.** Treatment Effects of SEP-1 Sepsis Bundle and Components in Rebalanced Cohorts with Time Zero of Sepsis <48 or >48 Hours After Arrival

**eTable 13.** Post Hoc Sensitivity Analyses

This supplementary material has been provided by the authors to give readers additional information about their work.

1 **eTable 1.** Pairwise Correlation Between Individual SEP-1 Sepsis Bundle Components for  
 2 Patients with Community-onset Sepsis and Hospital-onset Sepsis  
 3

| <b>Community-Onset Sepsis</b> |                |         |             |           |                         |
|-------------------------------|----------------|---------|-------------|-----------|-------------------------|
|                               | Blood cultures | Lactate | Antibiotics | IV Fluids | 2 <sup>nd</sup> Lactate |
| Lactate                       | 0.57           |         |             |           |                         |
| Antibiotics                   | 0.61           | 0.42    |             |           |                         |
| IV Fluids                     | -0.037         | -0.045  | -0.022      |           |                         |
| 2 <sup>nd</sup> Lactate       | 0.065          | 0.045   | 0.029       | -0.12     |                         |
| Vasopressors                  | 0.01           | 0.012   | -0.015      | 0.012     | 0.024                   |
| <b>Hospital-Onset Sepsis</b>  |                |         |             |           |                         |
|                               | Blood cultures | Lactate | Antibiotics | IV Fluids | 2 <sup>nd</sup> Lactate |
| Lactate                       | 0.33           |         |             |           |                         |
| Antibiotics                   | 0.66           | 0.28    |             |           |                         |
| IV Fluids                     | -0.038         | -0.10   | -0.0396     |           |                         |
| 2 <sup>nd</sup> Lactate       | 0.068          | 0.036   | 0.098       | -0.031    |                         |
| Vasopressors                  | 0.005          | 0.015   | 0.082       | 0.082     | -0.001                  |

4  
 5 **Legend:** Community-onset sepsis was defined by time zero of sepsis occurring in the emergency  
 6 department. Hospital-onset sepsis was defined by time zero of sepsis occurring on an inpatient  
 7 unit even if signs or symptoms of sepsis preceded admission.

8 **eTable 2.** Relative Risk of In-hospital Mortality Associated with Clinical Variables in the Raw  
 9 Cohorts with Community-onset and Hospital-onset Sepsis  
 10

|                    | Community-Onset Sepsis<br>n = 4108 |                | Hospital-Onset Sepsis<br>n = 2296 |                |
|--------------------|------------------------------------|----------------|-----------------------------------|----------------|
|                    | Relative Risk                      | p-value        | Relative Risk                     | p-value        |
| Age in years       | <b>1.01</b>                        | < <b>0.001</b> | <b>1.01</b>                       | <b>0.001</b>   |
| ECI                | <b>1.06</b>                        | < <b>0.001</b> | <b>1.08</b>                       | < <b>0.001</b> |
| Female             | 1.03                               | 0.60           | 1.08                              | 0.36           |
| Postoperative      | 1.21                               | 0.35           | 1.05                              | 0.69           |
| Pneumonia POA      | <b>1.41</b>                        | < <b>0.001</b> | 1.19                              | 0.09           |
| UTI POA            | <b>0.66</b>                        | < <b>0.001</b> | <b>0.68</b>                       | <b>0.002</b>   |
| SSTI POA           | 0.83                               | 0.21           | 0.93                              | 0.70           |
| New Bacteremia     | 1.04                               | 0.66           | 1.28                              | <b>0.032</b>   |
| Immunosuppressed   | <b>1.25</b>                        | <b>0.005</b>   | <b>1.26</b>                       | <b>0.008</b>   |
| Fever              | <b>0.47</b>                        | < <b>0.001</b> | <b>0.64</b>                       | < <b>0.001</b> |
| Septic Shock       | <b>1.84</b>                        | < <b>0.001</b> | <b>1.27</b>                       | <b>0.005</b>   |
| - Hypotension      | 0.92                               | 0.26           | 0.97                              | 0.73           |
| - Elevated Lactate | <b>0.83</b>                        | <b>0.033</b>   | 1.25                              | 0.10           |

11 **Legend:** POA, present on admission. UTI, urinary tract infection. SSTI, skin and/or soft tissue  
 12 infection. Bold font denotes a statistically significant standardized difference for an  $\alpha = 0.05$ .  
 13

14  
15 **eTable 3.** Characteristics of the Total Sample Before and After Being Rebalanced on Propensity  
16 for Treatment and Observable Characteristics  
17

|                                         | Raw Total Sample |           |               | Rebalanced Total Sample |           |               |
|-----------------------------------------|------------------|-----------|---------------|-------------------------|-----------|---------------|
|                                         | Treated          | Untreated | SD            | Treated                 | Untreated | SD            |
| <b>Time Zero of Sepsis (Hours*)</b>     | 8.97             | 34.3      | <b>-0.33</b>  | 6.55                    | 8.45      | <b>-0.025</b> |
| <b>Age</b>                              | 65.6             | 63.3      | <b>0.13</b>   | 65.9                    | 66.1      | -0.011        |
| <b>Female (%)</b>                       | 43.7             | 45.3      | -0.033        | 43.6                    | 44.68     | -0.003        |
| <b>Elixhauser Comorbidities</b>         | 4.91             | 5.14      | <b>-0.076</b> | 4.84                    | 4.85      | -0.003        |
| <b>Postoperative (%)</b>                | 3.01             | 9.67      | <b>-0.28</b>  | 1.98                    | 1.98      | 0             |
| <b>Pneumonia POA† (%)</b>               | 34.0             | 25.3      | <b>0.19</b>   | 34.0                    | 34.0      | 0             |
| <b>Urinary tract infection (%)</b>      | 25.4             | 21.2      | <b>0.10</b>   | 26.0                    | 26.0      | 0             |
| <b>Skin / soft tissue infection (%)</b> | 7.99             | 6.03      | <b>0.077</b>  | 7.88                    | 6.53      | 0.053         |
| <b>New Bacteremia‡ (%)</b>              | 14.6             | 14.5      | 0.003         | 14.6                    | 15.8      | -0.033        |
| <b>Immunosuppressed (%)</b>             | 19.2             | 24.7      | <b>-0.13</b>  | 18.3                    | 18.3      | 0             |
| <b>Fever (%)</b>                        | 36.8             | 22.7      | <b>0.31</b>   | 35.5                    | 35.5      | 0             |
| <b>Septic Shock (%)</b>                 | 27.5             | 42.7      | <b>-0.32</b>  | 27.2                    | 27.2      | 0             |
| <b>- Hypotension</b>                    | 35.5             | 55.0      | <b>-0.40</b>  | 35.8                    | 35.8      | 0             |
| <b>- Elevated Serum Lactate***</b>      | 28.7             | 17.2      | <b>0.28</b>   | 29.1                    | 27.8      | 0.029         |
| <b>Hospital 1 (%)</b>                   | 9.85             | 11.6      | <b>-0.055</b> | 9.49                    | 9.49      | 0             |
| <b>Hospital 2 (%)</b>                   | 13.5             | 17.3      | <b>-0.10</b>  | 13.2                    | 13.2      | 0             |
| <b>Hospital 3 (%)</b>                   | 32.7             | 41.3      | <b>-0.18</b>  | 32.9                    | 32.9      | 0             |
| <b>Hospital 4 (%)</b>                   | 43.9             | 29.9      | <b>0.29</b>   | 44.5                    | 44.5      | 0             |

18  
19 **Legend:** SD, standardized difference. POA, present on admission. Bold font denotes a  
20 statistically significant standardized difference for an  $\alpha = 0.05$ . \* Hours from admission. †  
21 Pneumonia POA was determined by diagnosis codes. ‡ New bacteremia was defined by positive  
22 blood culture after time zero of sepsis in a patient who did not have a positive blood culture in  
23 the preceding week. Possible skin contaminants were excluded. \*\*\* Elevated serum lactate was  
24 defined as a value of >20 mmol/L at time of onset of sepsis or in the preceding 6 hours. To meet  
25 the definition of shock, serum lactate needed to be 4 mmol/L or greater.

26 **eTable 4.** Relative Risk of In-hospital Mortality Associated with Clinical Variables in the Raw  
 27 Total Sample  
 28

|                                         | Relative Risk | 95% Confidence Interval | p-value           |
|-----------------------------------------|---------------|-------------------------|-------------------|
| <b>SEP-1 Sepsis Bundle</b>              | 0.99          | (0.88, 1.12)            | 0.88              |
| <b>Hospital-Onset of Sepsis</b>         | 1.05          | (0.94, 1.17)            | 0.381             |
| <b>Age in years*</b>                    | <b>1.01</b>   | <b>(1.01, 1.01)</b>     | <b>&lt; 0.001</b> |
| <b>Female</b>                           | 1.06          | (0.96, 1.17)            | 0.28              |
| <b>Elixhauser Comorbidities*</b>        | <b>1.07</b>   | <b>(1.05, 1.08)</b>     | <b>&lt; 0.001</b> |
| <b>Postoperative</b>                    | 1.35          | (0.88, 1.30)            | 0.48              |
| <b>Pneumonia POA</b>                    | <b>1.35</b>   | <b>(1.21, 1.50)</b>     | <b>&lt; 0.001</b> |
| <b>Urinary Tract infection POA</b>      | <b>0.67</b>   | <b>(0.58, 0.77)</b>     | <b>&lt; 0.001</b> |
| <b>Skin / soft tissue infection POA</b> | 0.85          | (0.68, 1.06)            | 0.16              |
| <b>New Bacteremia</b>                   | 1.12          | (0.98, 1.28)            | 0.10              |
| <b>Immunosuppressed</b>                 | <b>1.25</b>   | <b>(1.11, 1.40)</b>     | <b>&lt; 0.001</b> |
| <b>Fever</b>                            | <b>0.51</b>   | <b>(0.44, 0.59)</b>     | <b>&lt; 0.001</b> |
| <b>Septic Shock</b>                     | <b>1.55</b>   | <b>(1.40, 1.72)</b>     | <b>&lt; 0.001</b> |

29  
 30 **Legend:** POA, present on admission. \* Relative risk is reported for incremental increase in 1  
 31 year of age or 1 additional Elixhauser comorbidity.

32 **eTable 5.** Results from Endogenous Treatment Effects Models Compared with  
 33 Unweighted/Unbalanced Regression

34

| Treatment      |    | ATET   | NATE  |
|----------------|----|--------|-------|
| SEP-1          | MD | +0.10  | -0.23 |
|                | VD | +0.26  | -0.60 |
| Blood Cultures | MD | -5.01  | +0.97 |
|                | VD | -0.44  | -0.28 |
| Serum Lactate  | MD | -2.68  | +1.26 |
|                | VD | -0.004 | +0.28 |
| Antibiotics    | MD | -3.83  | -1.03 |
|                | VD | -0.45  | -0.27 |
| IV Fluids      | MD | -0.57  | +2.64 |
|                | VD | -0.23  | -0.10 |

35

36 **Legend:** ATET, average treatment effect on the treated. NATE, naïve (i.e., unweighted /  
 37 unbalanced) treatment effect. MD, Mortality difference calculated as the average difference in  
 38 probabilities between the treated and untreated (unit is percentage points); VD, vasopressor days;  
 39 IV, intravenous.

40 **eTable 6.** Prespecified Sensitivity Analyses Evaluating Treatment Effect of the Complete SEP-1  
 41 Bundle in Different Cohorts\*  
 42

| <b>Subgroup</b>      | <b>Mortality Difference<sup>†</sup></b> | <b>Vasopressor Days</b>   |
|----------------------|-----------------------------------------|---------------------------|
| Age $\geq$ 65        | -0.01% (-3.88, 3.86)                    | <b>+0.37 (0.14, 0.60)</b> |
| Age < 65             | +1.94% (-1.37, 5.26)                    | <b>+0.48 (0.21, 0.75)</b> |
| Pneumonia POA        | -0.96% (-6.70, 4.77)                    | +0.59 (0.26, 0.92)        |
| No Pneumonia POA     | +1.30% (-1.40, 4.00)                    | +0.32 (0.11, 0.52)        |
| Immunosuppressed     | +4.63% (-1.53, 10.8)                    | <b>+0.86 (0.45, 1.28)</b> |
| Not Immunosuppressed | -0.61% (-3.42, 2.21)                    | <b>+0.26 (0.07, 0.45)</b> |
| New Bacteremia       | +1.35% (-5.03, 7.72)                    | +0.45 (-0.09, 0.99)       |
| No New Bacteremia    | +0.23% (-2.62, 3.07)                    | <b>+0.38 (0.20, 0.57)</b> |
| Fever                | +2.30% (-0.97, 5.56)                    | <b>+0.33 (0.07, 0.59)</b> |
| Afebrile             | +0.53% (-2.93, 3.99)                    | <b>+0.40 (0.18, 0.62)</b> |
| Septic Shock         | +2.19% (-3.05, 7.43)                    | <b>+0.55 (0.14, 0.97)</b> |
| Sepsis without Shock | -0.38% (-3.58, 2.82)                    | 0.01 (-0.16, 0.19)        |

43  
 44 **Legend:** SEP-1 refers to the Early Management Bundle for Severe Sepsis / Septic Shock  
 45 (National Quality Forum #0500). \* Dedicated propensity and outcomes models were run within  
 46 the subgroup of interest. Subgroup analyses excluded all encounters from outside the subgroup. †  
 47 Difference in probability of in-hospital death was estimated as the average treatment effect on  
 48 the treated and is expressed in percentage points.

49 **eTable 7.** Treatment Effects of SEP-1 Bundle Components in Different Cohorts\*  
 50

|                                                |    | Blood Cultures               | Lactate             | Antibiotics                  | IV Fluids†          |
|------------------------------------------------|----|------------------------------|---------------------|------------------------------|---------------------|
| <b>Age ≥ 65</b><br><b>n = 2459</b>             | MD | -9.58 (-200, 0.86)           | -3.51 (-9.06, 2.03) | -3.84 (-8.81, 1.14)          | -3.83 (-12.2, 4.51) |
|                                                | VD | <b>-0.88 (-1.69, -0.07)</b>  | 0.15 (-0.28, 0.59)  | <b>-0.42 (-0.82, -0.01)</b>  | -0.18 (-0.86, 0.49) |
| <b>Age &lt; 65</b><br><b>n = 2854</b>          | MD | -2.37 (-8.19, 3.45)          | -1.18 (-5.73, 3.38) | 1.40 (-2.60, 5.40)           | 5.61 (-1.02, 12.2)  |
|                                                | VD | -0.48 (-1.00, 0.04)          | -0.06 (-0.47, 0.35) | -0.18 (-0.54, 0.18)          | -0.13 (-0.83, 0.57) |
| <b>Pneumonia POA</b><br><b>n = 1613</b>        | MD | -10.3 (-25.5, 4.91)          | -2.41 (-11.0, 6.18) | -3.38 (-10.9, 4.13)          | 1.95 (-15.9, 19.8)  |
|                                                | VD | -0.26 (-0.90, 0.85)          | 0.31 (-0.31, 0.94)  | -0.08 (-0.63, 0.46)          | -0.14 (-1.72, 1.44) |
| <b>No Pneumonia POA</b><br><b>n = 3975</b>     | MD | -2.75 (-8.01, 2.50)          | -2.27 (-6.43, 1.88) | -3.60 (-8.00, 0.82)          | -2.61 (-8.83, 3.62) |
|                                                | VD | <b>-0.58 (-1.08, -0.07)</b>  | -0.09 (-0.44, 0.27) | <b>-0.61 (-0.99, -0.22)</b>  | -0.35 (-0.90, 0.21) |
| <b>Immunosuppressed</b><br><b>n = 1376</b>     | MD | -3.60 (-14.7, 7.50)          | -1.21 (-10.3, 7.85) | 0.08 (-8.32, 8.47)           | 12.4 (-3.59, 28.4)  |
|                                                | VD | -0.24 (-0.99, 0.50)          | 0.25 (-0.40, 0.89)  | <b>-0.75 (-1.50, -0.001)</b> | 0.22 (-1.46, 1.91)  |
| <b>Non-immunosuppressed</b><br><b>n = 4352</b> | MD | -5.76 (-13.0, 1.47)          | -3.01 (-7.39, 1.36) | -4.01 (-8.02, 0.01)          | -1.97 (-8.18, 4.24) |
|                                                | VD | <b>-0.79 (-1.42, -0.16)</b>  | -0.03 (-0.38, 0.31) | <b>-0.38 (-0.70, -0.06)</b>  | -0.43 (-0.97, 0.11) |
| <b>New Bacteremia</b><br><b>n = 738</b>        | MD | -13.9 (-28.4, 0.53)          | -4.98 (-18.1, 8.12) | -4.33 (-12.5, 3.81)          | -1.43 (-19.5, 16.6) |
|                                                | VD | <b>-2.11 (-3.53, -0.69)</b>  | -0.24 (-1.22, 0.74) | <b>-1.34 (-2.08, -0.60)</b>  | -0.07 (-1.71, 1.58) |
| <b>No New Bacteremia</b><br><b>n = 5476</b>    | MD | -2.34 (-8.40, 3.73)          | -2.11 (-6.13, 1.92) | -2.80 (-6.38, 0.77)          | -0.04 (-6.22, 6.14) |
|                                                | VD | -0.28 (-0.76, 0.21)          | 0.18 (-0.15, 0.51)  | -0.20 (-0.49, 0.09)          | -0.16 (-0.71, 0.39) |
| <b>Fever</b><br><b>n = 1722</b>                | MD | 0.23 (-17.3, 17.7)           | -4.62 (-14.0, 4.72) | -2.03 (-8.54, 4.48)          | 3.60 (-3.70, 10.9)  |
|                                                | VD | 0.81 (-0.26, 1.87)           | 0.02 (-0.66, 0.69)  | -0.25 (-0.77, 0.28)          | 0.28 (-0.68, 1.24)  |
| <b>Afebrile</b><br><b>n = 4225</b>             | MD | -5.22 (-11.1, 0.64)          | -3.47 (-7.92, 0.98) | -2.77 (-6.69, 1.14)          | 0.47 (-7.05, 7.98)  |
|                                                | VD | <b>-0.61 (-1.08, -0.15)</b>  | 0.01 (-0.31, 0.34)  | <b>-0.38 (-0.69, -0.06)</b>  | -0.36 (-1.03, 0.32) |
| <b>Septic Shock</b><br><b>n = 2248</b>         | MD | -4.58 (-14.5, 5.29)          | -3.39 (-12.9, 6.20) | -6.54 (-13.7, 0.61)          | -6.30 (-14.5, 1.94) |
|                                                | VD | -0.55 (-1.50, 0.40)          | 0.11 (-0.62, 0.83)  | -0.45 (-1.00, 0.10)          | -0.61 (-1.32, 0.11) |
| <b>Sepsis without Shock</b><br><b>n = 3164</b> | MD | -6.42 (-13.0, 0.11)          | -3.63 (-7.95, 0.68) | -2.45 (-5.99, 1.10)          | 2.66 (-6.58, 11.9)  |
|                                                | VD | <b>-0.36 (-0.71, -0.003)</b> | -0.17 (-0.47, 0.13) | -0.11 (-0.31, 0.08)          | 0.19 (-0.40, 0.79)  |

51  
 52 **Legend:** MD, Mortality difference calculated as the average difference in probabilities between  
 53 the treated and untreated (unit is percentage points); VD, vasopressor days; 95% CI, 95%  
 54 confidence interval. POA, present on admission. \* Dedicated propensity and outcomes models  
 55 were run within the subgroup of interest. Subgroup analyses excluded all encounters from  
 56 outside the subgroup. † Only measured among individuals in whom intravenous fluids were  
 57 indicated based on SEP-1 guidance



58 **eTable 8.** Treatment Effects of SEP-1 Sepsis Bundle and Components on 30-day In-hospital  
 59 Mortality in Total Sample and Rebalanced Cohorts with Community-onset & Hospital-onset  
 60 Sepsis  
 61

|                         | Total Sample                 | Community-Onset Sepsis       | Hospital-Onset Sepsis        |
|-------------------------|------------------------------|------------------------------|------------------------------|
|                         | Risk Difference*<br>(95% CI) | Risk Difference*<br>(95% CI) | Risk Difference*<br>(95% CI) |
| SEP-1 Bundle            | +0.49 (-1.93, 2.90)          | +0.67 (-2.16, 3.49)          | +0.91 (-5.29, 7.11)          |
| Blood cultures          | -5.13 (-11.0, 0.74)          | -5.98 (-15.2, 3.25)          | -2.43 (-8.31, 3.45)          |
| Serum Lactate           | -1.86 (-5.63, 1.92)          | -5.76 (-12.4, 0.88)          | +0.44 (-4.94, 4.06)          |
| Antibiotics             | -3.78 (-7.67, 0.11)          | -3.72 (-8.90, 1.47)          | -4.12 (-8.99, 0.74)          |
| Intravenous Crystalloid | +1.14 (-4.07, 6.36)          | +0.84 (-5.91, 7.59)          | -4.63 (-15.1, 5.84)          |

62  
 63 **Legend:** 95% CI, 95% confidence interval. SEP-1 refers to the Early Management Bundle for  
 64 Severe Sepsis / Septic Shock (National Quality Forum #0500). \* Mortality is expressed as an  
 65 absolute probability difference between the average of the treated and the average of the  
 66 untreated, expressed in terms of percentage points.

67 **eTable 9.** Treatment Effects of SEP-1 Sepsis Bundle and Components on Hospital Length of  
 68 Stay (Measured from Time Zero of Sepsis Until Discharge)  
 69

|                         | Total Sample                | Community-Onset Sepsis      | Hospital-Onset Sepsis       |
|-------------------------|-----------------------------|-----------------------------|-----------------------------|
|                         | Length of Stay*<br>(95% CI) | Length of Stay*<br>(95% CI) | Length of Stay*<br>(95% CI) |
| SEP-1 Bundle            | -0.54 (-1.41, 0.33)         | -0.79 (-1.93, 0.35)         | -1.08 (-3.42, 1.27)         |
| Blood cultures          | -0.05 (-1.78, 1.69)         | +1.43 (-0.72, 3.58)         | -1.35 (-3.99, 1.28)         |
| Serum Lactate           | -0.28 (-1.43, 0.87)         | -0.47 (-2.63, 1.69)         | -0.99 (-2.84, 0.85)         |
| Antibiotics             | +0.26 (-0.65, 1.17)         | +0.78 (-0.38, 1.93)         | +0.42 (-1.28, 2.12)         |
| Intravenous Crystalloid | -1.15 (-2.86, 0.55)         | -0.71 (-2.73, 1.30)         | +1.49 (-1.41, 4.38)         |

70  
 71 **Legend:** 95% CI, 95% confidence interval. SEP-1 refers to the Early Management Bundle for  
 72 Severe Sepsis / Septic Shock (National Quality Forum #0500). \* Length of stay is expressed in  
 73 days from time zero of sepsis until discharge.

74 **eTable 10.** Treatment Effects of SEP-1 Sepsis Bundle and Components on Composite Outcome  
 75 of In-hospital Mortality or Discharge to Hospice  
 76

|                         | Total Sample                 | Community-Onset Sepsis       | Hospital-Onset Sepsis        |
|-------------------------|------------------------------|------------------------------|------------------------------|
|                         | Risk Difference*<br>(95% CI) | Risk Difference*<br>(95% CI) | Risk Difference*<br>(95% CI) |
| SEP-1 Bundle            | -0.43 (-3.37, 2.52)          | +0.08 (-3.39, 3.23)          | -2.97% (-9.91, 3.96)         |
| Blood cultures          | -5.00 (-11.0, 1.04)          | -10.2% (-19.3, -1.01)        | +0.31% (-5.88, 6.49)         |
| Serum Lactate           | -1.35 (-5.28, 2.58)          | -6.14 (-13.3, 1.01)          | -1.01% (-5.96, 3.94)         |
| Antibiotics             | -3.58 (-7.52, 0.36)          | -3.16 (-8.40, 2.08)          | -4.78% (-9.70, 0.14)         |
| Intravenous Crystalloid | -2.18 (-7.74, 3.38)          | -4.23 (-11.6, 3.10)          | -6.08 (-17.4, 5.25)          |

77  
 78 **Legend:** 95% CI, 95% confidence interval. SEP-1 refers to the Early Management Bundle for  
 79 Severe Sepsis / Septic Shock (National Quality Forum #0500). \* Risk differences were estimated  
 80 as the average treatment effect on the treated and are expressed in terms of percentage points.

81 **eTable 11.** Treatment Effects of SEP-1 Sepsis Bundle and Components in Rebalanced Cohorts  
 82 with Sepsis Presenting on the Inpatient Ward or Intensive Care Unit  
 83

|                         | Ward-Onset Sepsis<br>(n = 987) |                     | ICU-Onset Sepsis<br>(n = 1,128) |                     |
|-------------------------|--------------------------------|---------------------|---------------------------------|---------------------|
|                         | Mortality Risk<br>Difference*  | 95% CI              | Mortality Risk<br>Difference*   | 95% CI              |
| SEP-1 Bundle            | +1.70                          | (-15.2, 18.6)       | -0.50                           | (-11.2, 10.2)       |
| Blood cultures          | -8.11                          | (-19.3, 3.04)       | -1.78                           | (-12.6, 9.11)       |
| Serum Lactate           | +3.45                          | (-5.75, 12.6)       | -1.30                           | (-10.2, 7.5)        |
| Antibiotics             | -5.79                          | (-14.1, 2.54)       | -5.81                           | (-14.4, 2.83)       |
| Intravenous Crystalloid | Utd                            | Utd                 | -4.76                           | (-21.6, 12.1)       |
|                         | Vasopressor<br>Days*           | 95% CI              | Vasopressor<br>Days*            | 95% CI              |
| SEP-1 Bundle            | +0.53                          | (-0.16, 1.22)       | <b>1.07</b>                     | <b>(0.14, 2.00)</b> |
| Blood cultures          | +0.29                          | (-0.22, 0.81)       | -0.33                           | (-1.23, 0.57)       |
| Serum Lactate           | <b>+0.70</b>                   | <b>(0.01, 1.40)</b> | +0.34                           | (-0.34, 1.02)       |
| Antibiotics             | +0.29                          | (-0.11, 0.70)       | -0.22                           | (-0.93, 0.49)       |
| Intravenous Crystalloid | Utd                            | Utd                 | +0.35                           | (-0.93, 1.63)       |

84  
 85 **Legend:** ICU, intensive care unit. Utd, unable to determine. 95% CI, 95% confidence interval.  
 86 SEP-1 refers to the Early Management Bundle for Severe Sepsis / Septic Shock (National  
 87 Quality Forum #0500). \* Differences in probability of in-hospital mortality and days spent on  
 88 vasopressors were estimated as the average treatment effect on the treated. Mortality risk  
 89 difference was expressed in terms of percentage points.

90 **eTable 12.** Treatment Effects of SEP-1 Sepsis Bundle and Components in Rebalanced Cohorts  
 91 with Time Zero of Sepsis <48 or >48 Hours After Arrival  
 92

|                         | Time Zero < 48 Hours<br>After Arrival |                       | Time Zero > 48 Hours<br>After Arrival |               |
|-------------------------|---------------------------------------|-----------------------|---------------------------------------|---------------|
|                         | Mortality Risk<br>Difference*         | 95% CI                | Mortality Risk<br>Difference*         | 95% CI        |
| SEP-1 Bundle            | +0.16                                 | (-2.39, 2.72)         | 1.26                                  | (-22.3, 24.8) |
| Blood cultures          | -6.08                                 | (-13.0, 0.85)         | -4.16                                 | (-15.1, 6.81) |
| Serum Lactate           | <b>-5.26</b>                          | <b>(-9.82, -0.70)</b> | +7.77                                 | (-4.80, 20.3) |
| Antibiotics             | <b>-4.33</b>                          | <b>(-8.33, -0.32)</b> | -5.67                                 | (-16.1, 4.79) |
| Intravenous Crystalloid | -0.92                                 | (-7.29, 5.46)         | +34.2                                 | (-15.2, 84.4) |
|                         | Vasopressor<br>Days*                  | 95% CI                | Vasopressor<br>Days*                  | 95% CI        |
| SEP-1 Bundle            | +0.37                                 | (-0.02, 0.03)         | 0.13                                  | (-1.38, 1.64) |
| Blood cultures          | <b>-0.64</b>                          | <b>(-1.19, -0.09)</b> | -0.28                                 | (-1.20, 0.64) |
| Serum Lactate           | -0.10                                 | (-0.45, 0.25)         | 0.82                                  | (-0.04, 1.69) |
| Antibiotics             | <b>-0.45</b>                          | <b>(-0.77, -0.12)</b> | -0.48                                 | (-1.44, 0.48) |
| Intravenous Crystalloid | -0.48                                 | (-1.00, 0.05)         | 0                                     | (0, 0)        |

93  
 94 **Legend:** 95% CI, 95% confidence interval. SEP-1 refers to the Early Management Bundle for  
 95 Severe Sepsis / Septic Shock (National Quality Forum #0500). \* Differences in probability of in-  
 96 hospital mortality and days spent on vasopressors were estimated as the average treatment effect  
 97 on the treated. Mortality risk difference was expressed in terms of percentage points.

98 **eTable 13.** Post Hoc Sensitivity Analyses

99

|                         | <b>Admitted from Home<br/>(n = 3732 matched)</b> |                       | <b>Source Other than Home<br/>(n = 2077 matched)</b> |                     |
|-------------------------|--------------------------------------------------|-----------------------|------------------------------------------------------|---------------------|
|                         | Mortality Risk Difference*                       | 95% CI                | Mortality Risk Difference*                           | 95% CI              |
| SEP-1 Bundle            | -0.04                                            | (-3.13, 3.05)         | 1.33                                                 | (-3.31, 5.97)       |
| Blood cultures          | -0.59                                            | (-5.99, 4.82)         | -7.63                                                | (-16.4, 1.14)       |
| Serum Lactate           | -4.27                                            | (-9.70, 1.17)         | -4.46                                                | (-11.6, 2.68)       |
| Antibiotics             | -2.66                                            | (-6.93, 1.62)         | -5.28                                                | (-11.5, 0.91)       |
| Intravenous Crystalloid | -3.02                                            | (-10.2, 4.21)         | 0.32                                                 | (-6.23, 6.87)       |
|                         | Vasopressor Days                                 | 95% CI                | Vasopressor Days                                     | 95% CI              |
| SEP-1 Bundle            | 0.33                                             | (0.13, 0.54)          | <b>0.59</b>                                          | <b>(0.27, 0.90)</b> |
| Blood cultures          | -0.54                                            | (-1.12, 0.04)         | -0.40                                                | (-1.03, 0.23)       |
| Serum Lactate           | 0.02                                             | (-0.38, 0.41)         | 0.01                                                 | (-0.55, 0.58)       |
| Antibiotics             | <b>-0.45</b>                                     | <b>(-0.79, -0.10)</b> | -0.09                                                | (-0.51, 0.33)       |
| Intravenous Crystalloid | -0.51                                            | (-1.15, 0.14)         | -0.10                                                | (-0.65, 0.45)       |
|                         | <b>Malignancy Absent<br/>(n = 4521 matched)</b>  |                       | <b>Malignancy Present<br/>(n = 978 matched)</b>      |                     |
|                         | Mortality Risk Difference*                       | 95% CI                | Mortality Risk Difference*                           | 95% CI              |
| SEP-1 Bundle            | 1.11                                             | (-1.60, 3.83)         | -1.23                                                | (-8.81, 6.35)       |
| Blood cultures          | -6.01                                            | (-12.6, 0.60)         | -8.46                                                | (-21.8, 4.92)       |
| Serum Lactate           | -0.66                                            | (-4.59, 3.28)         | -10.0                                                | (-22.0, 0.10)       |
| Antibiotics             | -3.89                                            | (-8.04, 0.26)         | 0.69                                                 | (-8.58, 9.96)       |
| Intravenous Crystalloid | 0.32                                             | (-6.23, 6.87)         | -2.01                                                | (-16.1, 12.0)       |
|                         | Vasopressor Days*                                | 95% CI                | Vasopressor Days*                                    | 95% CI              |
| SEP-1 Bundle            | 0.46                                             | (0.27, 0.65)          | 0.17                                                 | (-0.32, 0.66)       |
| Blood cultures          | -0.40                                            | (-0.86, 0.06)         | -0.78                                                | (-1.84, 0.29)       |
| Serum Lactate           | 0.09                                             | (-0.25, 0.43)         | -0.22                                                | (-0.96, 0.51)       |
| Antibiotics             | <b>-0.48</b>                                     | <b>(-0.83, -0.14)</b> | -0.11                                                | (-0.88, 0.67)       |
| Intravenous Crystalloid | -0.10                                            | (-0.65, 0.45)         | -0.39                                                | (-1.65, 0.87)       |

100

101 **Legend:** 95% CI, 95% confidence interval. SEP-1 refers to the Early Management Bundle for  
102 Severe Sepsis / Septic Shock (National Quality Forum #0500). \* Differences in probability of in-  
103 hospital mortality and days spent on vasopressors were estimated as the average treatment effect  
104 on the treated. Mortality risk difference was expressed in terms of percentage points.
